# Supplementary material for: Effects of progressive body-weight versus barbell back squat training on strength, hypertrophy and body fat among sedentary young women
Source: PubMed Central journal article supplement (PMC10439966; doi:10.1038/s41598-023-40319-x), 2023-08-19
Supplement: 41598_2023_40319_MOESM3_ESM.pdf [file 41598_2023_40319_MOESM3_ESM.pdf]

Table 1. Bodyweight squat progression (a)

| Subjects | First session |         | Second session |           | Third session |            | Fourth session |            |
|----------|---------------|---------|----------------|-----------|---------------|------------|----------------|------------|
|          | level         | R × S   | level          | R × S     | level         | R × S      | level          | R × S      |
| 1        | E/F/G/        | 12/10/8 | E/F/G/         | 12/10/10/ | E/F/G/        | 12/10/10/1 | E/F/G/         | 12/10/10/1 |
|          | G/G/G         | /8/8/8  | G/G/G          | 10/10/8   | G/G/G         | 0/10/10    | G/G/G          | 0/10/10    |
| 2        | E/F/G/        | 12/10/8 | E/F/G/         | 12/10/10/ | E/F/G/        | 12/10/10/1 | E/F/G/         | 12/10/10/1 |
|          | G/G/G         | /8/8/8  | G/G/G          | 10/8/8    | G/G/G         | 0//10      | G/G/G          | 0/10/10    |
| 3        | E/F/G/        | 12/10/8 | E/F/G/         | 12/10/10/ | E/F/G/        | 12/10/10/1 | E/F/G/         | 12/10/10/1 |
|          | G/G/G         | /8/8/8  | G/G/G          | 10/10/8   | G/G/G         | 0/10/10    | G/G/G          | 0/10/10    |
| 4        | E/F/G/        | 12/10/8 | E/F/G/         | 12/10/10/ | E/F/G/        | 12/10/10/1 | E/F/G/         | 12/10/10/1 |
|          | G/G/G         | /8/8/8  | G/G/G          | 10/10/8   | G/G/G         | 0/10/10    | G/G/G          | 0/10/10    |
| 5        | E/F/G/        | 12/10/8 | E/F/G/         | 12/10/10/ | E/F/G/        | 12/10/10/1 | E/F/G/         | 12/10/10/1 |
|          | G/G/G         | /8/8/8  | G/G/G          | 10/10/8   | G/G/G         | 0/10/10    | G/G/G          | 0/10/10    |
| 6        | E/F/G/        | 12/10/8 | E/F/G/         | 12/10/10/ | E/F/G/        | 12/10/10/1 | E/F/G/         | 12/10/10/1 |
|          | G/G/G         | /8/8/8  | G/G/G          | 8/8/8     | G/G/G         | 0/10/10    | G/G/G          | 0/10/10    |

Table 1. Bodyweight squat progression (b)

| Subjects | Fifth session |           | Sixth session |          | Seventh session |            | Eighth session |            |
|----------|---------------|-----------|---------------|----------|-----------------|------------|----------------|------------|
|          | level         | R × S     | level         | R × S    | level           | R × S      | level          | R × S      |
| 1        | E/F/H/        | 12/10/6/1 | F/G/H/        | 12/10/8/ | F/G/H/          | 12/10/8/8/ | F/G/H/         | 12/10/10/1 |
|          | G/G/G         | 0/10/10   | H/H/H         | 8/8/8    | H/H/H           | 8/8        | H/H/H          | 0/10/10    |
| 2        | F/G/H/        | 12/10/8/8 | F/G/H/        | 12/10/10 | F/G/H/          | 12/10/10/1 | G/H/I/I/       | 12/10/8/8/ |
|          | H/H/H         | /8/8      | H/H/H         | /8/8/8   | H/H/H           | 0/10/10    | I/I            | 8/8        |
| 3        | F/G/H/        | 12/10/8/8 | F/G/H/        | 12/10/10 | F/G/H/          | 12/10/10/1 | G/H/I/I/       | 12/10/8/8/ |
|          | H/H/H         | /8/8      | H/H/H         | /8/8/8   | H/H/H           | 0/10/10    | I/I            | 8/8        |
| 4        | F/G/H/        | 12/10/8/8 | F/G/H/        | 12/10/10 | F/G/H/          | 12/10/10/1 | G/H/I/I/       | 12/10/8/8/ |
|          | H/H/H         | /8/8      | H/H/H         | /10/8/8  | H/H/H           | 0/10/10    | I/I            | 8/8        |
| 5        | E/F/H/        | 12/10/6/6 | F/G/H/        | 12/10/8/ | F/G/H/          | 12/10/10/1 | F/G/H/         | 12/10/10/1 |
|          | H/G/G         | /10/10    | H/H/H         | 8/8/8    | H/H/H           | 0/8/8      | H/H/H          | 0/10/10    |
| 6        | E/F/H/        | 12/10/6/1 | F/G/H/        | 12/10/8/ | F/G/H/          | 12/10/10/8 | F/G/H/         | 12/10/10/1 |
|          | G/G/G         | 0/10/10   | H/H/H         | 8/8/8    | H/H/H           | /8/8       | H/H/H          | 0/10/10    |

Table 1. Bodyweight squat progression (c)

| Subjects | Ninth session |            | Tenth session |             | Eleventh session |             | Twelfth session |            |
|----------|---------------|------------|---------------|-------------|------------------|-------------|-----------------|------------|
|          | level         | R × S      | level         | R × S       | level            | R × S       | level           | R × S      |
| 1        | F/G/I/G       | 12/10/6/1  | F/G/I/I       | 12/10/8/8/1 | G/H/I/           | 12/10/8/8/8 | G/H/I/          | 12/10/10/  |
|          | /G/G          | 0/10/10    | /G/G          | 0/10        | I/I/I            | /8          | I/I/I           | 10/10/8    |
| 2        | G/H/I/I/      | 12/10/10/  | G/H/I/I       | 12/10/10/1  | G/H/J            | 12/10/6/10/ | G/H/J/          | 12/10/8/8/ |
|          | I/I           | 10/8/8     | /I/I          | 0/10/10     | /I/I/I           | 10/10       | J/J/I           | 6/10       |
| 3        | G/H/I/I/      | 12/10/10/  | G/H/I/I       | 12/10/10/1  | G/H/J            | 12/10/6/10/ | G/H/J/          | 12/10/8/8/ |
|          | I/I           | 10/10/8    | /I/I          | 0/10/10     | /I/I/I           | 10/10       | J/J/J           | 8/6        |
| 4        | G/H/I/I/      | 12/10/10/  | G/H/I/I       | 12/10/10/1  | G/H/I/           | 12/10/10/1  | G/H/J/          | 12/10/8/6/ |
|          | I/I           | 8/8/8      | /I/I          | 0/10/8      | I/I/I            | 0/10/10     | J/I/I           | 10/10      |
| 5        | G/H/I/I/      | 12/10/8/8/ | G/H/I/I       | 12/10/10/1  | G/H/I/           | 12/10/10/1  | G/H/J/          | 12/10/6/1  |
|          | I/I           | 8/8        | /I/I          | 0/10/8      | I/I/I            | 0/10/10     | I/I/I           | 0/10/10    |
| 6        | E/F/I/I/      | 12/10/8/8/ | G/H/I/I       | 12/10/10/1  | G/H/I/           | 12/10/10/1  | G/H/J/          | 12/10/6/1  |
|          | I/I           | 8/8        | /I/I          | 0/8/8       | I/I/I            | 0/10/10     | I/I/I           | 0/10/10    |

Note: Repetitions × Sets = R × S; 1-6 represents each participant; E: Lunge, F: Bulgarian single leg squat, G: Skating squat; The table shows the training volume and movement level (A -J) completed by the 6 participants in the bodyweight squat group in the first four training sessions.

Table 2. Barbell back squat progression (a)

| Subjects | First session |         | Second session |         | Third session |            | Fourth session |            |
|----------|---------------|---------|----------------|---------|---------------|------------|----------------|------------|
|          | weight        | R × S   | weight         | R × S   | weight        | R × S      | weight         | R × S      |
| 1        | 30/32/34/3    | 12/10/9 | 30/32/34/3     | 12/10/9 | 30/32/34/3    | 12/10/10/1 | 30/32/34/3     | 12/10/10/1 |
|          | 4/34/34       | /9/8/8  | 4/34/34        | /9/9/9  | 4/34/34       | 0/10/10    | 4/34/34        | 0/10/10    |
| 2        | 40/44/46/4    | 12/10/9 | 40/44/46/4     | 12/10/9 | 40/44/46/4    | 12/10/10/1 | 40/44/46/4     | 12/10/10/1 |
|          | 6/46/46       | /9/8/8  | 6/46/46        | /9/9/9  | 6/46/46       | 0/10/10    | 6/46/46        | 0/10/10    |
| 3        | 40/44/46/4    | 12/10/9 | 40/44/46/4     | 12/10/9 | 40/44/46/4    | 12/10/10/1 | 40/44/46/4     | 12/10/10/1 |
|          | 6/46/46       | /8/8/8  | 6/46/46        | /9/9/9  | 6/46/46       | 0/10/10    | 6/46/46        | 0/10/10    |
| 4        | 46/50/54/5    | 12/10/9 | 46/50/54/5     | 12/10/9 | 46/50/54/5    | 12/10/10/1 | 46/50/54/5     | 12/10/10/1 |
|          | 4/54/54       | /8/8/8  | 4/54/54        | /9/9/9  | 4/54/54       | 0/10/10    | 4/54/54        | 0/10/10    |
| 5        | 40/44/46/4    | 12/10/9 | 40/44/46/4     | 12/10/9 | 40/44/46/4    | 12/10/10/1 | 40/44/46/4     | 12/10/10/1 |
|          | 6/46/46       | /9/8/8  | 6/46/46        | /9/9/9  | 6/46/46       | 0/10/10    | 6/46/46        | 0/10/10    |
| 6        | 40/44/46/4    | 12/10/9 | 40/44/46/4     | 12/10/9 | 40/44/46/4    | 12/10/10/1 | 40/44/46/4     | 12/10/10/1 |
|          | 6/46/46       | /9/8/8  | 6/46/46        | /9/9/9  | 6/46/46       | 0/10/10    | 6/46/46        | 0/10/10    |
| 7        | 50/56/60/6    | 12/10/9 | 50/56/60/6     | 12/10/9 | 50/56/60/6    | 12/10/10/1 | 50/56/60/6     | 12/10/10/1 |
|          | 0/60/60       | /8/8/8  | 0/60/60        | /9/9/9  | 0/60/60       | 0/10/10    | 0/60/60        | 0/10/10    |

Table 2. Barbell back squat progression (b)

| Subjects | First session                         |                                       | Second session                        |                                       | Third session                         |                                       | Fourth session                        |                       |
|----------|---------------------------------------|---------------------------------------|---------------------------------------|---------------------------------------|---------------------------------------|---------------------------------------|---------------------------------------|-----------------------|
|          | weight                                | R × S                                 | weight                                | R × S                                 | weight                                | R × S                                 | weight                                | R × S                 |
|          | 1                                     | 32.5/34.5/3<br>6.5/36.5/36<br>.5/36.5 | 12/10/<br>8/8/8/8                     | 32.5/34.5/3<br>6.5/36.5/36<br>.5/36.5 | 12/10/<br>9/9/9/<br>9                 | 32.5/34.5/<br>36.5/36.5/<br>36.5/36.5 | 12/10/10<br>/10/10/1<br>0             | 35/37/39/3<br>9/39/39 |
| 2        | 42.5/46.5/4<br>8.5/48.5/48<br>.5/48.5 | 12/10/<br>8/8/8/8                     | 42.5/46.5/4<br>8.5/48.5/48<br>.5/48.5 | 12/10/<br>9/9/9/<br>9                 | 42.5/46.5/<br>48.5/48.5/<br>48.5/48.5 | 12/10/10<br>/10/10/1<br>0             | 45/49/51/4<br>8.5/48.5/48<br>.5       | 12/10/5/10<br>/7/7    |
| 3        | 42.5/46.5/4<br>8.5/48.5/48<br>.5/48.5 | 12/10/<br>8/8/8/8                     | 42.5/46.5/4<br>8.5/48.5/48<br>.5/48.5 | 12/10/<br>9/9/9/<br>9                 | 42.5/46.5/<br>48.5/48.5/<br>48.5/48.5 | 12/10/10<br>/10/10/1<br>0             | 46.5/48.5/5<br>1/51/48.5/4<br>8.5     | 12/10/8/7/<br>8/8     |
| 4        | 48.5/52.5/5<br>6.5/56.5/56<br>.5/56.5 | 12/10/<br>8/8/8/8                     | 48.5/52.5/5<br>6.5/56.5/56<br>.5/56.5 | 12/10/<br>9/9/9/<br>9                 | 48.5/52.5/<br>56.5/56.5/<br>56.5/56.5 | 12/10/10<br>/10/10/1<br>0             | 51/55/59/5<br>9/59/56.5               | 12/10/8/8/<br>6/8     |
| 5        | 42.5/46.5/4<br>8.5/48.5/48<br>.5/48.5 | 12/10/<br>8/8/8/8                     | 42.5/46.5/4<br>8.5/48.5/48<br>.5/48.5 | 12/10/<br>9/9/9/<br>9                 | 42.5/46.5/<br>48.5/48.5/<br>48.5/48.5 | 12/10/10<br>/10/10/1<br>0             | 42.5/46.5/4<br>8.5/48.5/48<br>.5/48.5 | 12/10/10/1<br>0/10/9  |
| 6        | 42.5/46.5/4<br>8.5/48.5/48<br>.5/48.5 | 12/10/<br>8/8/8/8                     | 42.5/46.5/4<br>8.5/48.5/48<br>.5/48.5 | 12/10/<br>9/9/9/<br>9                 | 42.5/46.5/<br>48.5/48.5/<br>48.5/48.5 | 12/10/10<br>/10/10/1<br>0             | 45/49/51/5<br>1/51/51                 | 12/10/8/8/<br>8/8     |
| 7        | 52.5/58.5/6<br>2.5/62.5/62<br>.5/62.5 | 12/10/<br>8/8/8/8                     | 52.5/58.5/6<br>2.5/62.5/62<br>.5/62.5 | 12/10/<br>9/9/9/<br>9                 | 52.5/58.5/<br>62.5/62.5/<br>62.5/62.5 | 12/10/10<br>/10/10/1<br>0             | 55/61/65/6<br>2.5/62.5/62<br>.5       | 12/10/6/10<br>/10/10  |

Table 2. Barbell back squat progression (c)

| Subjects | First session               |                       | Second session            |                       | Third session                 |                                       | Fourth session                    |                                       |
|----------|-----------------------------|-----------------------|---------------------------|-----------------------|-------------------------------|---------------------------------------|-----------------------------------|---------------------------------------|
|          | weight                      | R × S                 | weight                    | R × S                 | weight                        | R × S                                 | weight                            | R × S                                 |
|          | 1                           | 35/37/39/39/<br>39/39 | 12/10/9<br>/8/8/8         | 35/37/39/39<br>/39/39 | 12/10/10/<br>10/10/10         | 37.5/39.5/<br>41.5/41.5/<br>41.5/41.5 | 12/10/8/8<br>/8/6                 | 37.5/39.5/<br>41.5/41.5/<br>41.5/41.5 |
| 2        | 45/49/51/48.<br>5/48.5/48.5 | 12/10/6<br>/7/7/5     | 45/49/51/51<br>/51/51     | 12/10/8/8<br>/8/6     | 45/49/51/<br>51/51/51         | 12/10/9/9<br>/8/8                     | 45/49/51/<br>51/51/51             | 12/10/8/1<br>0/10/10                  |
| 3        | 46.5/48.5/51<br>/51/51/51   | 12/10/1<br>0/8/8/8    | 46.5/48.5/5<br>1/51/51/51 | 12/10/10/<br>10/10/10 | 49/51/53.<br>5/53.5/51/<br>51 | 12/10/8/7<br>/10/9                    | 49/51/53.5<br>/53.5/53.5<br>/53.5 | 12/10/8/8<br>/8/6                     |

|   |               |         |             |           |           |           |            |           |
|---|---------------|---------|-------------|-----------|-----------|-----------|------------|-----------|
| 4 | 51/55/59/59/  | 12/10/8 | 51/55/59/59 | 12/10/10/ | 51/55/59/ | 12/10/10/ | 53.5/57.5/ | 12/10/8/8 |
|   | 59/59         | /8/8/8  | /59/59      | 10/10/8   | 59/59/59  | 10/10/10  | 61.5/61.5/ | /8/7      |
| 5 | 42.5/46.5/48  | 12/10/1 | 45/49/51/51 | 12/10/8/8 | 45/49/51/ | 12/10/8/8 | 45/49/51/  | 12/10/9/9 |
|   | .5/48.5/48.5/ | 0/10/10 | /51/48.5    | /7/9      | 51/51/51  | /8/8      | 51/51/51   | /8/9      |
| 6 | 45/49/51/51/  | 12/10/8 | 45/49/51/51 | 12/10/9/9 | 45/49/51/ | 12/10/10/ | 45/49/51/  | 12/10/10/ |
|   | 51/51         | /8/8/7  | /51/51      | /8/8      | 51/51/51  | 10/10/8   | 51/51/51   | 10/10/10  |
| 7 | 55/61/65/65/  | 12/10/8 | 55/61/65/65 | 12/10/9/1 | 55/61/65/ | 12/10/10/ | 55/61/65/  | 12/10/10/ |
|   | 65/62.5       | /8/6/10 | /65/65      | 0/8/8     | 65/65/65  | 10/10/8   | 65/65/65   | 10/10/10  |

---
